# Supplementary material for: Long Term Follow-Up on Pediatric Cases With Congenital Myasthenic Syndromes—A Retrospective Single Centre Cohort Study
Source: PubMed Central journal article supplement (PMC7750519; doi:10.3389/fnhum.2020.560860), 2020-12-07
Supplement: Data_Sheet_1.pdf [file Data_Sheet_1.pdf]

| 6 Motor Milestones       |                                                     |                                                        |                                           |                                                           |                           |                            |
|--------------------------|-----------------------------------------------------|--------------------------------------------------------|-------------------------------------------|-----------------------------------------------------------|---------------------------|----------------------------|
| <b>Head Control</b>      | Unable to maintain head upright                     | Wobbles                                                | All the time maintained upright           |                                                           |                           |                            |
| <b>Sitting</b>           | Cannot sit                                          | Sits with support at hips                              | Props                                     | Stable sit                                                | Pivots (rotates)          | Observed:<br>Reported age: |
| <b>Voluntary grasp</b>   | No grasp                                            | Uses whole hand                                        | Index finger and thumb but immature grasp | Pincer grasp                                              |                           | Observed:<br>Reported age: |
| <b>Ability to kick</b>   | No kicking                                          | Kicks legs horizontally / legs do not lift             | Upward (vertically)                       | Touches leg                                               | Touches toes              | Observed:<br>Reported age: |
| <b>Rolling</b>           | No rolling                                          | Rolling to side                                        | Prone to supine                           | Supine to prone                                           |                           | Observed:<br>Reported age: |
| <b>Crawling</b>          | Does not lift head                                  | Props on elbow normal at 3 months                      | Props on outstretched hand                | Crawling flat on abdomen                                  | Crawls on hands and knees | Observed:<br>Reported age: |
| <b>Standing</b>          | Does not support weight                             | Supports weight                                        | Stands with support                       | Stands unaided                                            |                           | Observed:<br>Reported age: |
| <b>Walking</b>           |                                                     | Bouncing                                               | Cruising (walks holding on)               | Walking independently                                     |                           | Observed:<br>Reported age: |
| <b>Score</b>             | <b>0</b>                                            | <b>1</b>                                               | <b>1.5</b>                                | <b>2</b>                                                  | <b>Asymmetry</b>          | <b>Comments</b>            |
| <b>Facial Appearance</b> | Expressio nless; does not react to stimuli          | Closes eyes but not tightly; poor facial expression    |                                           | Smiles or reacts to stimuli by closing eyes and grimacing |                           |                            |
| <b>Eye appearance</b>    | Continuou s Deviation of eyes or abnormal movements | Intermittent Deviation of eyes or abnormal movements   |                                           | Normal conjugated eye movement                            |                           |                            |
| <b>Auditory response</b> | Does not react to stimuli                           | Doubtful reaction to stimuli or asymmetrical           |                                           | Reacts to stimuli on both sides                           |                           |                            |
| <b>Visual response</b>   | Does not follow the arc                             | Follows the object for an incomplete arc, or asymmetry |                                           | Follows the object for a complete arc                     |                           |                            |

|                                                 |                                     |                        |          |          |          |                          |
|-------------------------------------------------|-------------------------------------|------------------------|----------|----------|----------|--------------------------|
| <b>Time started tests.....</b>                  |                                     |                        |          |          |          |                          |
| <b>Time of last medication..... Medication:</b> |                                     |                        |          |          |          |                          |
| <b>7 Timed Tests</b>                            |                                     |                        |          |          |          |                          |
|                                                 | <b>Time in seconds</b>              | <b>Change ?</b><br>↑↓≈ | <b>0</b> | <b>1</b> | <b>2</b> | <b>3</b>                 |
| <b>7a Ptosis</b>                                |                                     |                        | >60      | 11-60    | 1-10     | 0                        |
| Asymmetry Y<br>Details.....                     |                                     |                        |          |          |          |                          |
| <b>7b Ptosis</b>                                | Cannot open eyes at all             |                        |          |          |          | <input type="checkbox"/> |
|                                                 | Can open eyes momentarily / briefly |                        |          |          |          | <input type="checkbox"/> |
|                                                 | Can open eyes for a few seconds     |                        |          |          |          | <input type="checkbox"/> |
|                                                 | No ptosis                           |                        |          |          |          | <input type="checkbox"/> |

|    |                                                                                                |  |
|----|------------------------------------------------------------------------------------------------|--|
| 7c | If they can sit independently how long is this for? (minutes)                                  |  |
| 7d | If they need support how long can they tolerate before they need to change position? (minutes) |  |
| 7e | If they can lift their legs in the air how long can they do this for?                          |  |
| 7f | Props on extended forearms                                                                     |  |
| 7c | If they can sit independently how long is this for? (minutes)                                  |  |
| 7d | If they need support how long can they tolerate before they need to change position? (minutes) |  |
| 7e | If they can lift their legs in the air how long can they do this for?                          |  |
| 7f | Props on extended forearms                                                                     |  |

Supplementary Figure 1A: standardized test for children up to 3 years.
